# Supplementary material for: Predictors of Mortality among United States Veterans with Human Immunodeficiency Virus and Hepatitis C Virus Coinfection
Source: PubMed Central journal article supplement (PMC4004106; doi:10.1155/2014/764540), 2014-04-07
Supplement: 764540.f1.pdf [file 764540.f1.pdf]

Supplementary table 1: Association of HCV status with mortality among HIV infected Veterans in a multivariable regression model, including adjustment for baseline HIV RNA level.

| Variable            | HR (95 % CI)<br>N = 2553 |
|---------------------|--------------------------|
| HCV status          | 1.47(1.21,1.79)          |
| Age (per 10 yrs)    | 1.3(1.16,1.47)           |
| Male vs Female      | 0.8(0.41,1.55)           |
| Black vs White      | 0.86(0.7,1.04)           |
| Hispanic vs White   | 0.88(0.63,1.24)          |
| BMI                 | 0.94(0.92,0.96)          |
| Smoking             | 0.84(0.67,1.04)          |
| Hypertension        | 1.02(0.84,1.23)          |
| Diabetes            | 1.29(1.04,1.6)           |
| DLD                 | 2.28(1.9,2.73)           |
| COPD                | 1.43(1.13,1.82)          |
| Anemia              | 1.43(1.16,1.75)          |
| CKD                 | 1.86(1.53,2.25)          |
| CAD                 | 2.32(1.77,3.03)          |
| Stroke              | 1.42(0.89,2.27)          |
| PVD                 | 0.62(0.31,1.2)           |
| Thromboembolism     | 0.51(0.13,2.09)          |
| Cancer              | 1.5(1.2,1.89)            |
| Drug abuse          | 0.96(0.78,1.19)          |
| Alcohol abuse       | 1.24(1,1.55)             |
| Major depression    | 1.12(0.86,1.45)          |
| CD4 count (per 100) | 0.93(0.89,0.96)          |
| HIV RNA (per 1000)  | 1.0009(1.0003,1.0014)    |

Supplementary table 2: Association of several baseline variables with mortality in univariate Cox regression models

| Variable                    | HR (95% CI)       | p-value |
|-----------------------------|-------------------|---------|
| HCV positive                | 1.76 (1.59,1.96)  | <0.0001 |
| Age (per 10 yrs)            | 1.63 (1.54-1.74)  | <0.0001 |
| Male vs Female              | 0.97 (0.68-1.39)  | 0.18    |
| Black vs White              | 1.18 (1.07, 1.31) | 0.001   |
| Hispanic vs White           | 1.00 (0.84,1.22)  | 0.93    |
| Body mass index             | 0.92 (0.91, 0.93) | <0.0001 |
| Smoking                     | 1.15 (1.03, 1.29) | 0.01    |
| Hypertension                | 1.31 (1.19,1.44)  | <0.0001 |
| Diabetes                    | 1.59 (1.42,1.79)  | <0.0001 |
| DLD                         | 3.80 (3.43,4.20)  | <0.0001 |
| COPD                        | 1.93 (1.68,2.21)  | <0.0001 |
| Anemia                      | 2.76 (2.51,3.05)  | <0.0001 |
| CKD                         | 2.66 (2.42,2.92)  | <0.0001 |
| CAD                         | 2.66 (2.26,3.13)  | <0.0001 |
| Stroke                      | 2.15 (1.59,2.91)  | <0.0001 |
| PVD                         | 1.61 (1.24,2.10)  | 0.0004  |
| Venous thromboembolism      | 0.90 (0.38,2.17)  | 0.81    |
| Cancer                      | 1.78 (1.57,2.03)  | <0.0001 |
| Drug abuse                  | 1.22 (1.12,1.34)  | <0.0001 |
| Alcohol abuse               | 1.23 (1.11,1.36)  | <0.0001 |
| Major depression            | 0.94 (0.82,1.09)  | <0.0001 |
| CD4 count (per 100 cell/ul) | 0.85 (0.83,0.87)  | <0.0001 |
| HCV treatment               | 0.47 (0.36,0.60)  | <0.0001 |

Supplementary table 3: Univariate predictors of mortality in HIV infected individuals by HCV status

|                     | HCV+             | P=      | HCV-             | P=      |
|---------------------|------------------|---------|------------------|---------|
|                     |                  | value   |                  | value   |
| Age (per 10 yrs)    | 1.60 (1.49-1.71) | <0.0001 | 1.60 (1.42-1.81) | <0.0001 |
| Male vs Female      | 0.93 (0.63-1.36) | 0.18    | 1.55 (0.58-4.16) | 0.38    |
| Black vs White      | 1.02 (0.91-1.15) | 0.91    | 1.49 (1.21-1.82) | <0.0001 |
| Hispanic vs White   | 0.97 (0.79-1.12) | 0.74    | 0.61 (0.35-1.06) | 0.081   |
| BMI                 | 0.93(0.92,0.95)  | 0.79    | 0.89(0.87,0.91)  | 0       |
| Smoking             | 1.09(0.96,1.23)  | 0.20    | 1.25(0.99,1.58)  | 0.066   |
| Hypertension        | 1.25(1.12,1.39)  | <0.0001 | 1.42(1.17,1.73)  | <0.0001 |
| Diabetes            | 1.47(1.29,1.67)  | <0.0001 | 1.93(1.52,2.45)  | <0.0001 |
| DLD                 | 3.54(3.15,3.98)  | <0.0001 | 4.33(3.50,5.35)  | <0.0001 |
| COPD                | 1.90(1.63,2.21)  | <0.0001 | 1.81(1.33,2.46)  | <0.0001 |
| Anemia              | 2.58(2.31,2.89)  | <0.0001 | 3.08(2.52,3.77)  | <0.0001 |
| CKD                 | 2.53(2.27,2.81)  | <0.0001 | 3.12(2.56,3.80)  | <0.0001 |
| CAD                 | 2.51(2.08,3.03)  | <0.0001 | 3.22(2.34,4.44)  | <0.0001 |
| Stroke              | 1.63(1.11,2.38)  | 0.012   | 4.02(2.44,6.62)  | <0.0001 |
| PVD                 | 1.71(1.29,2.28)  | <0.0001 | 1.19(0.61,2.30)  | 0.61    |
| Thromboembolism     | 1.87(0.60,5.81)  | 0.28    | 0.74(0.18,2.98)  | 0.67    |
| Cancer              | 1.88(1.63,2.19)  | <0.0001 | 1.79(1.40,2.30)  | <0.0001 |
| Drug abuse          | 1.12(1.01,1.24)  | 0.029   | 0.95(0.74,1.22)  | 0.68    |
| Alcohol abuse       | 1.13(1.01,1.26)  | 0.033   | 1.15(0.90,1.47)  | 0.27    |
| Major depression    | 0.96(0.81,1.12)  | 0.59    | 0.79(0.56,1.12)  | 0.18    |
| CD4 count (per 100) | 0.85(0.83,0.87)  | <0.0001 | 0.83(0.79,0.87)  | 0.000   |
| HCV treatment       | 0.39(0.30,0.50)  | <0.0001 | -                | -       |
